# Supplementary material for: Surface self-reconstructed amorphous/crystalline hybrid iron disulfide for high-efficiency water oxidation electrocatalysis
Source: Royal Society of Chemistry journal article supplement (doi:10.1039/d1dt00730k), 2021-01-01
Supplement: d1dt00730k1.pdf [file d1dt00730k1.pdf]

Supplementary Information

**Surface self-reconstructed amorphous/crystalline hybrid iron disulfide for high-efficiency water oxidation electrocatalysis**

*Guanzhi Wang,<sup>a</sup> Chuanyu Jin,<sup>a</sup> Guoteng Zhang,<sup>a</sup> Lijuan Qian,<sup>a</sup> Xiao Chen,<sup>a</sup> Jianfei Tan,<sup>a</sup> Wenhui Wang,<sup>a</sup> Jie Yin,<sup>\*,a</sup> Xin liu,<sup>b,c</sup> Huawei Zhou,<sup>\*,a</sup>*

*<sup>a</sup> School of Materials Science and Engineering; School of Chemistry and Chemical Engineering; Shandong Provincial Key Laboratory/Collaborative Innovation Center of Chemical Energy Storage; Liaocheng University*

*<sup>b</sup> School of Materials Science and Engineering, Northeastern University, Shenyang 110819*

*<sup>c</sup> School of Resources and Materials, Northeastern University at Qinhuangdao, Qinhuangdao 066004, PR China*

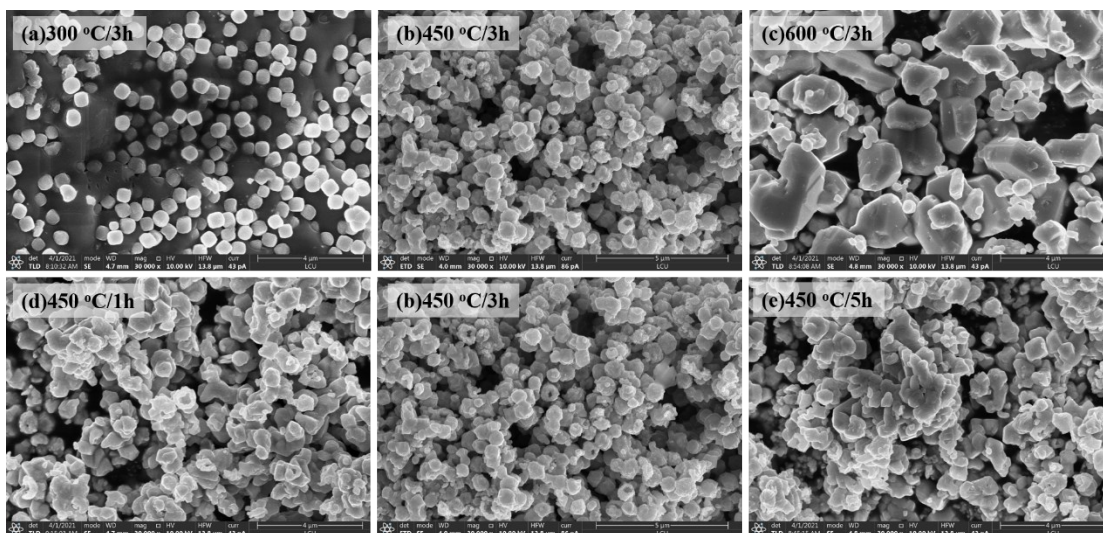

Figure S1 SEM images of the samples synthesized at different temperatures and time

(a)300 °C/3h (b)450 °C/3h (c)600 °C/3h (d)450 °C/1h (e)450 °C/5h

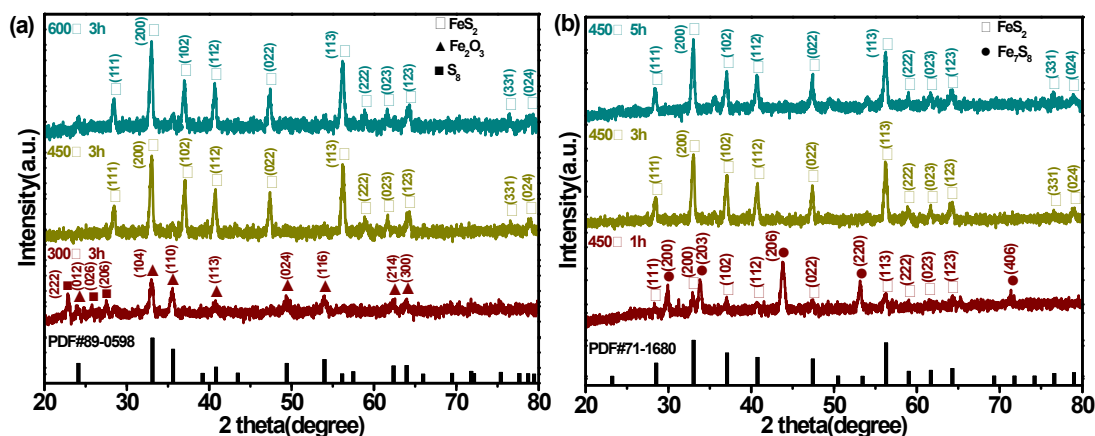

Figure S2 XRD patterns of the samples synthesized (a) at different temperatures for 3 hours and (b) at 450 °C for different hours

### TOF calculation:

In order to better understand the intrinsic activity, the turnover frequency (TOF) of all the samples for OER at the same potential had been provided. Figure S3 is the turnover frequency (TOF) of the samples for OER at the same overpotential (332.8 mV)

To calculate the per-site turnover frequency (TOF), we used the following formula<sup>1</sup>:

$$TOF \text{ per site} = \frac{\#Total \text{ Oxygen Turn Overs}/cm^2}{Sites (Catalyst)/cm^2}$$

The total number of oxygen turn overs was calculated from the current density

according to the following conversion:

$$\left(\frac{j}{\text{cm}^2}\right)\left(\frac{1\text{A}}{1000\text{mA}}\right)\left(\frac{1\text{C/s}}{1\text{A}}\right)\left(\frac{1\text{mol } e^-}{96485.3\text{ C}}\right)\left(\frac{1\text{ mol } O_2}{4\text{ mol } e^-}\right)\left(\frac{6.02214 \times 10^{23}\text{ molecules } O_2}{1\text{ mol } O_2}\right)$$

$$= 1.56 \times 10^{15} \frac{O_2/s}{\text{cm}^2} \text{ per } \frac{\text{mA}}{\text{cm}^2}$$

Since the exact oxygen binding site is not known, we estimate the number of sites as the number of sample molecular calculated based on the mass of the samples used in the electrochemical measurements according to the following conversion:

*Site (FeS<sub>2</sub>)*

$$= \left(1\text{mg} \times \frac{1}{\text{cm}^2}\right) \left(\frac{6.02214 \times \frac{10^{23}}{\text{mol}} \text{FeS}_2 \text{ sties}}{119.967 \times \frac{10^3\text{mg}}{\text{mol}}}\right) = 5.01983 \times 10^{18} \text{ sites/cm}^2$$

*Sites (Fe<sub>2</sub>O<sub>3</sub>)*

$$= \left(1\text{mg} \times \frac{1}{\text{cm}^2}\right) \left(\frac{6.02214 \times \frac{10^{23}}{\text{mol}} \text{Fe}_2\text{O}_3 \text{ sties}}{159.688 \times \frac{10^3\text{mg}}{\text{mol}}}\right) = 3.77119 \times 10^{18} \text{ sites/cm}^2$$

*Sites (RuO<sub>2</sub>)*

$$= \left(1\text{mg} \times \frac{1}{\text{cm}^2}\right) \left(\frac{6.02214 \times \frac{10^{23}}{\text{mol}} \text{RuO}_2 \text{ sites}}{133.07 \times \frac{10^3\text{mg}}{\text{mol}}}\right) = 4.52554 \times 10^{18} \text{ sites/cm}^2$$

Based on the current density at the same overpotential (332.8 mV), the per site TOF is determined as follows:

*TOF per FeS<sub>2</sub> (332.8 mV)*

$$= \frac{\# \text{Total Oxygen Turn Overs/cm}^2}{\text{Sites (Catalyst)/cm}^2} = \frac{1.56 \times 10^{15} \frac{O_2/s}{\text{cm}^2} \text{ per } \frac{\text{mA}}{\text{cm}^2}}{5.01983 \times 10^{18} \text{ sites/cm}^2}$$

$$= 0.031 \frac{O_2/s}{\text{site}}$$

TOF per  $Fe_2O_3$  (332.8 mV)

$$\begin{aligned}
 &= \frac{\#Total\ Oxygen\ Turn\ Overs/cm^2}{Sites\ (Catalyst)/cm^2} = \frac{1.56 \times 10^{15} \frac{O_2/s}{cm^2} per \frac{mA}{cm^2}}{3.77119 \times 10^{18} site} \\
 &= 0.013 \frac{O_2/s}{site}
 \end{aligned}$$

TOF per  $RuO_2$  (332.8 mV)

$$\begin{aligned}
 &= \frac{\#Total\ Oxygen\ Turn\ Overs/cm^2}{Sites\ (Catalyst)/cm^2} = \frac{1.56 \times 10^{15} \frac{O_2/s}{cm^2} per \frac{mA}{cm^2}}{4.52554 \times 10^{18} site} \\
 &= 0.015 \frac{O_2/s}{site}
 \end{aligned}$$

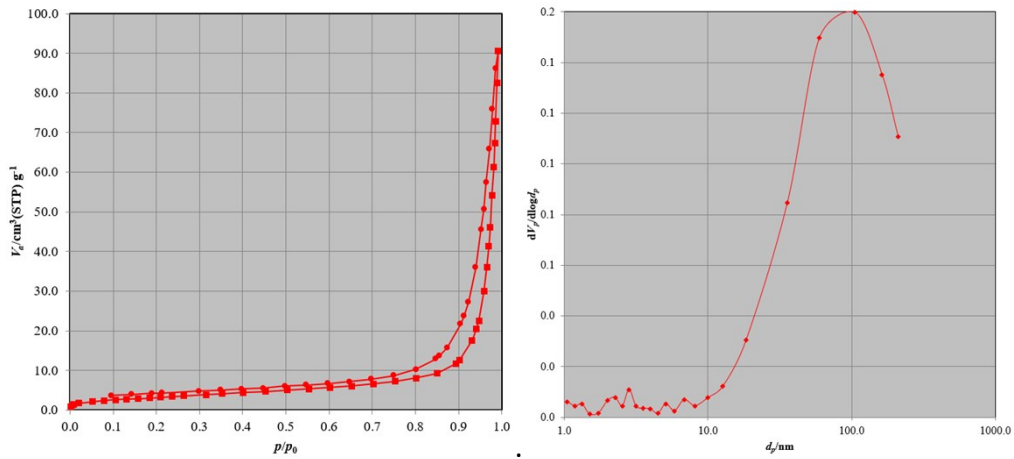

Figure S3 Nitrogen adsorption-desorption isotherms and pore size distribution of the pre-catalyst of amorphous/crystalline hybrid iron disulfide

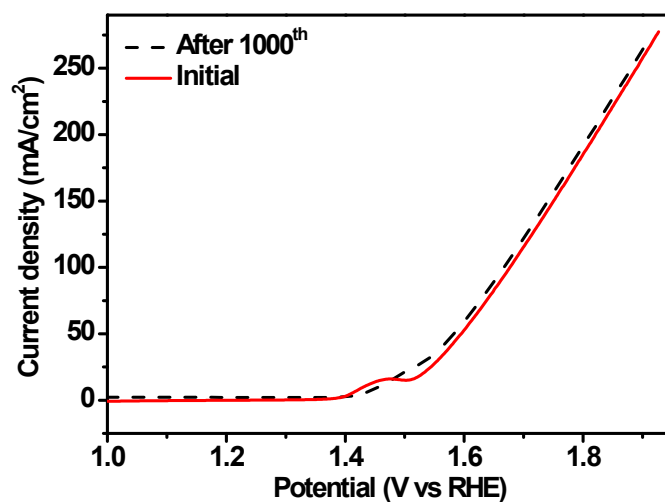

Figure S4 the polarization curve of FeS<sub>2</sub> after 1000 cycles of CV

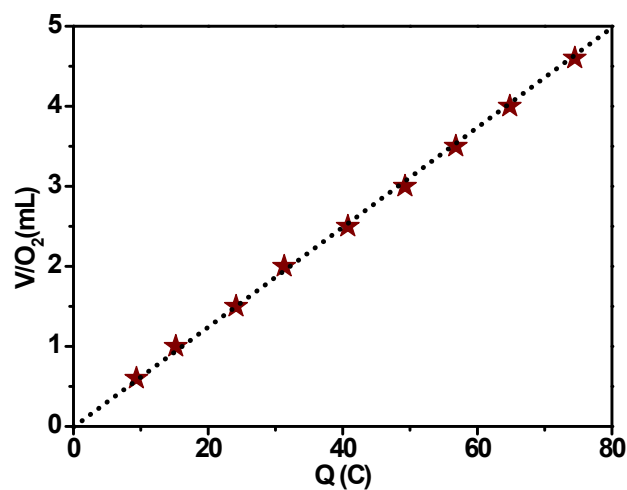

Figure S5 Plot showing the volume of oxygen evolved as a function of the passed charge. The data points for FeS<sub>2</sub>/NF//Pt/C/NF fall on the dotted line representing 100 % Faradaic efficiency as calculated from Faraday's law of electrolysis and the ideal gas law

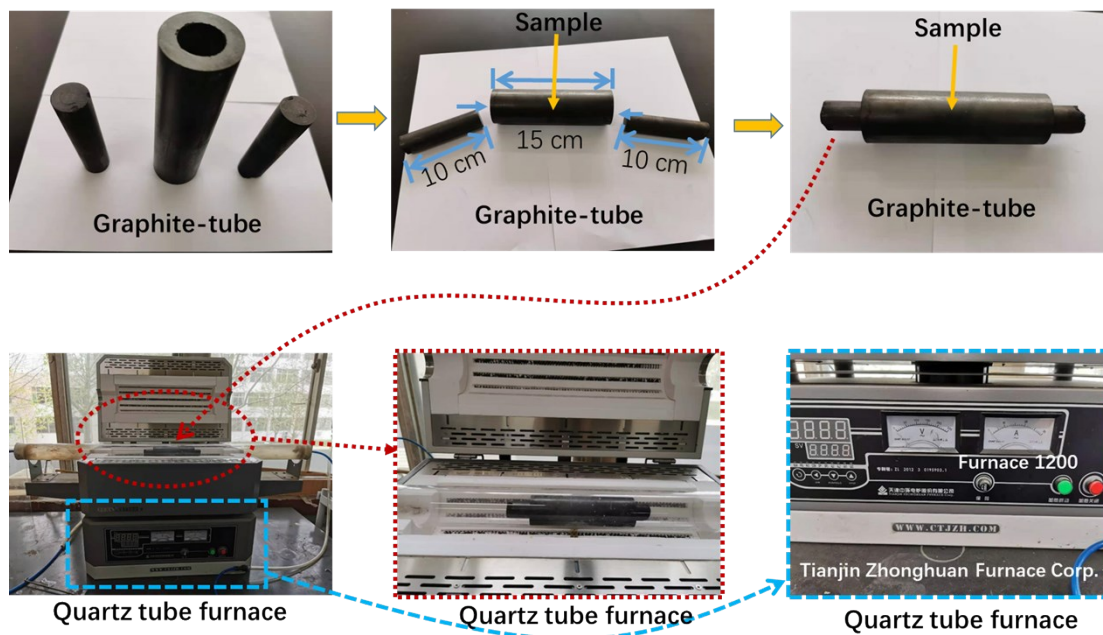

Figure S6 Dimensions of graphite-tube and type of tube furnace
